# Supplementary material for: Infliximab versus ciclosporin in steroid resistant acute severe ulcerative colitis: a model-based cost-utility analysis of data from CONSTRUCT pragmatic trial
Source: Springer Nature journal article supplement (doi:10.1186/s12913-023-09233-w), 2023-03-08
Supplement: MOESM1 [file 12913_2023_9233_MOESM1_ESM.pdf]

## Supplementary Documents

### Appendix 1

A Decision Tree Model was developed based on events occurred in CONSTRUCT trial patients over 24 months follow up. The decision tree has the same structure (pathways) for both infliximab and ciclosporin groups. 'Initial' period represents 0-3 months, 'mid-term' represents 4-12 months and 'late' represents 13-24 months of the 2 years duration in the decision tree.

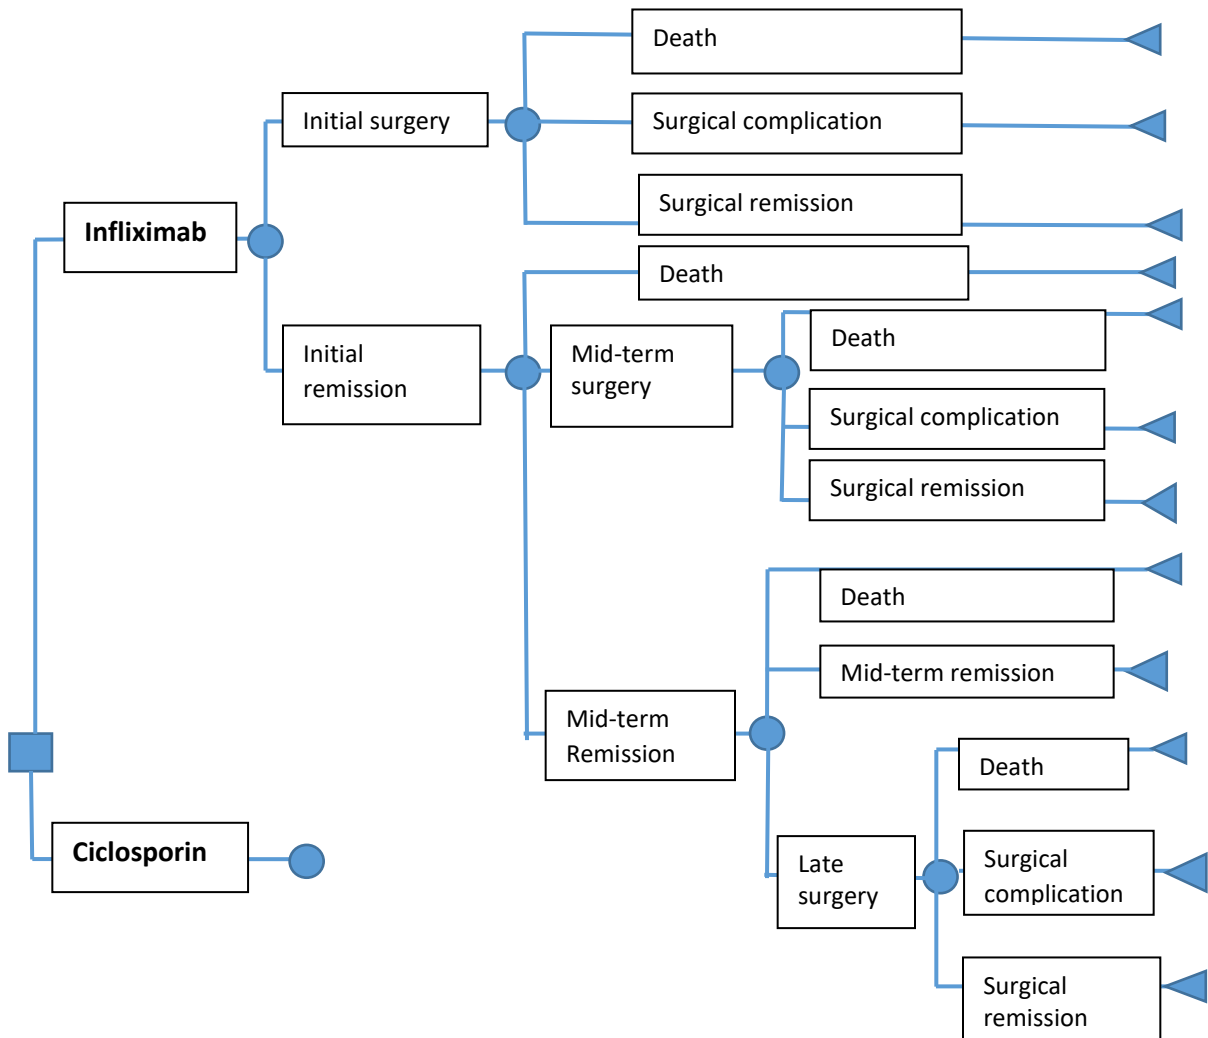

## Appendix 2

Long-term Markov model for patients in remission beyond 24 months. Patients can move across different health states in the Markov model. After surgery patients can achieve surgical remission or experience surgical complications, achieve surgical remission afterwards, or they can die.

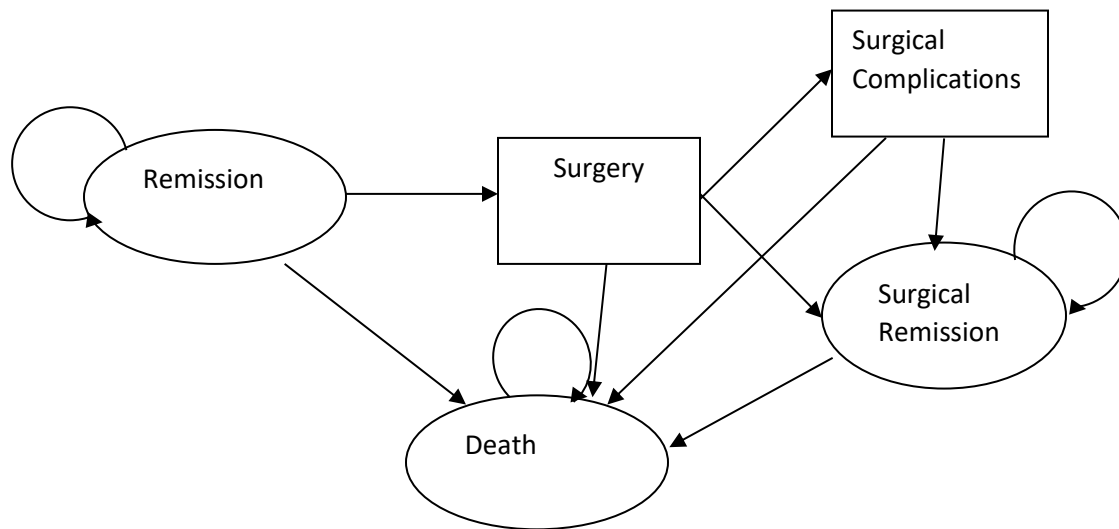

## Appendix 3

Cumulative number of colectomies (%) in the trial at various follow-up time points for two treatment groups

| Follow-up    | Ciclosporin (n=135) |      | Infliximab (n=135) |      |
|--------------|---------------------|------|--------------------|------|
|              | Number              | %    | Number             | %    |
| 3 months FU  | 42                  | 31.1 | 38                 | 28.1 |
| 12 months FU | 62                  | 45.9 | 47                 | 34.8 |
| 24 months FU | 65                  | 48.1 | 54                 | 40.0 |
| 30 months FU | 65                  | 48.1 | 55                 | 40.7 |

## Appendix 4

Model parameters in the Markov Model

|                                      | Base value | Standard error | Source                                 |
|--------------------------------------|------------|----------------|----------------------------------------|
| Inflx_lambda                         | 0.1113     | 0.0967         | Weibull regression;<br>CONSTRUCT trial |
| Inlx_gamma                           | 0.3927     | 0.0472         | Weibull regression;<br>CONSTRUCT trial |
| Ciclos_lambda                        | 0.1864     | 0.144          | Weibull regression;<br>CONSTRUCT trial |
| Ciclos_gamma                         | 0.4497     | 0.0474         | Weibull regression;<br>CONSTRUCT trial |
| Yearly mortality rate from remission | 0.048      |                | Roberts et al. (2007)                  |
| Yearly mortality rate after surgery  | 0.046      |                | Roberts et al. (2007)                  |
| <i>Utility Values</i>                |            |                |                                        |
| Remission_Inflx                      | 0.852      | 0.04           | CONSTRUCT trial                        |
| Remission_Ciclos                     | 0.923      | 0.019          | CONSTRUCT trial                        |
| Utility_Surgery_Inflx                | 0.761      | 0.06           | CONSTRUCT trial                        |
| Utility_Surgery_Ciclos               | 0.821      | 0.06           | CONSTRUCT trial                        |
| Post-surgery remission               | 0.692      | 0.07           | CONSTRUCT trial                        |

Note: Yearly mortality rate based on Roberts et al. (2007) [30]

## Appendix 5

The unit costs of two trial drugs

| Drug                          | Dose                    | Unit cost (£) |
|-------------------------------|-------------------------|---------------|
| Ciclosporin (Sandimmun)       | 50mg/ml, 1-ml ampoules  | £1.94         |
| Oral ciclosporin              | 100 mg, 30-capsule pack |               |
| Neoral                        |                         | £72.57        |
| Deximune (Dexcel Pharma Ltd.) |                         | £51.30        |
| Capimune (Mylan)              |                         | £51.30        |
| Infliximab (Remicade)         | 100-mg vial             | £419.62       |

Source: British National Formulary (BNF, 2015)

### Appendix 6

Kaplan-Meier survival curves showing colectomy-free survival for infliximab versus ciclosporin over the follow-up period in the CONSTRUCT trial

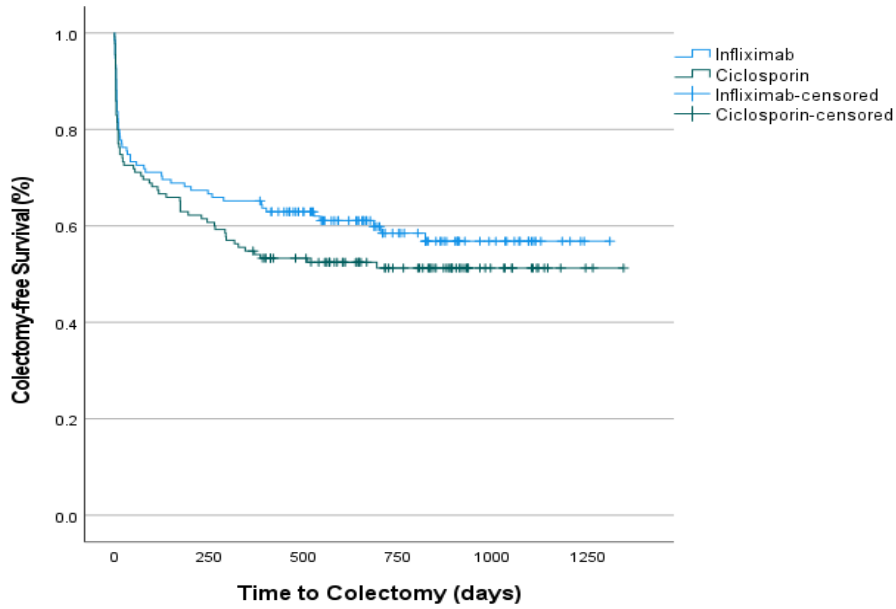

### Appendix 7

Weibull regression predicted transition probability of colectomy for both infliximab and ciclosporin groups

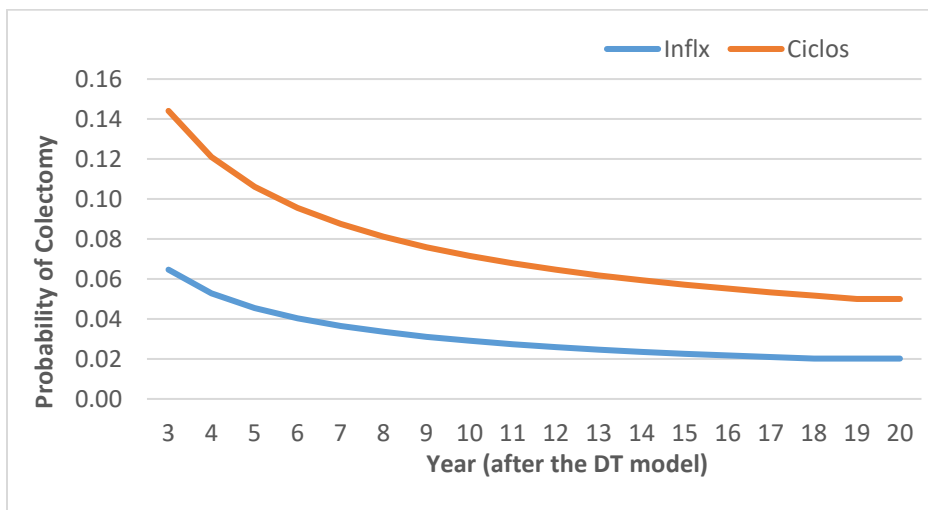

## Reference

Joint Formulary Committee. British National Formulary (Online). London: BMJ Group and Pharmaceutical Press. URL: [www.medicinescomplete.com](http://www.medicinescomplete.com) (accessed 28 June 2015)
